# Supplementary material for: The effect of missing teeth on dementia in older people: a nationwide population-based cohort study in South Korea
Source: BMC Oral Health. 2019 Apr 25;19:61. doi: 10.1186/s12903-019-0750-4 (PMC6485168; doi:10.1186/s12903-019-0750-4)
Supplement: Supplementary file 1 — Treatment codes and definition of behaviors associated with tooth extraction. (XLSX 9 kb) [file 12903_2019_750_MOESM1_ESM.xlsx]

## Sheet: Sheet1
<Additional file 1> Treatment codes and definition of behaviors associated with tooth extraction
Treatment code	Treatment name
U4411	Extraction-Deciduous tooth
U4412	Extraction-Anterior tooth
U4413	Extraction-Posterior tooth
U4414	Extraction-Complicated extraction
U4415	Extraction-Impacted tooth-Simple
U4416	Extraction-Impacted tooth-Complex
U4417	Extraction-Impacted tooth-Complete
