# Supplementary material for: The effect of missing teeth on dementia in older people: a nationwide population-based cohort study in South Korea
Source: BMC Oral Health. 2019 Apr 25;19:61. doi: 10.1186/s12903-019-0750-4 (PMC6485168; doi:10.1186/s12903-019-0750-4)
Supplement: Supplementary file 7 — Anti-dementia drugs and requirements for claiming NHIS insurance benefits. (XLSX 9 kb) [file 12903_2019_750_MOESM7_ESM.xlsx]

## Sheet: Sheet1
<Additional file 7> Anti-dementia drugs and requirements for claiming NHIS insurance benefits
	MMSEa	CDRa	GDSa
Rivastigmineb	10~26	1~2	3~5
Rivastigminec	≤26	1~3	3~7
Galantamineb	10~26	1~2	3~5
Memantineb	≤20	2~3	4~7
Donepezil HCl (5/10 mg)b	≤26	1~3	3~7
Donepezil HCl (23 mg)b	≤20	2~3	4~7
aIt is only necessary to satisfy the criterion of either CDR or GDS while satisfying the criteria of MMSE. MMSE: Mini-Mental State Examination; CDR: Clinical Dementia Rating; GDS: Global Deterioration Scale.
bOral medication
cPatch
